# Supplementary material for: Valorization of Spent Vetiver Roots for Biochar Generation
Source: MDPI journal article supplement (doi:10.3390/molecules29010063), 2023-12-21
Supplement: s1 [file s1]

# Valorization of Spent Vetiver Roots for Biochar Generation

Sameer Neve <sup>1</sup>, Dibyendu Sarkar <sup>1,\*</sup>, Manas Warke <sup>2</sup>, Teresa Bandosz <sup>3</sup> and Rupali Datta <sup>2</sup>

<sup>1</sup> Department of Civil, Environmental, and Ocean Engineering, Stevens Institute of Technology, Hoboken, NJ 07030, USA; sneve@stevens.edu

<sup>2</sup> Department of Biological Sciences, Michigan Technological University, Houghton, MI 49931, USA; mwarke@mtu.edu (M.W.); rupdatta@mtu.edu (R.D.)

<sup>3</sup> Department of Chemistry, City College of New York, New York, NY 10031, USA; tbandosz@ccny.cuny.edu

\* Correspondence: dsarkar@stevens.edu; Tel.: +1-201-216-8028

## Supplementary Information

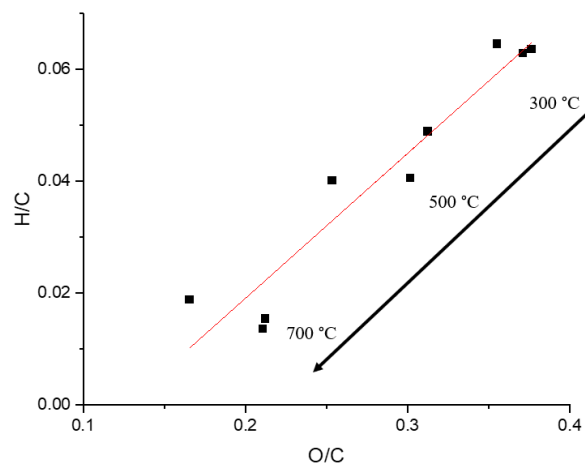

**Figure S1:** The Van Krevelen plot of biochar produced at 300, 500, and 700°C. Van Krevelen plot was generated using the atomic ratios of H/C and O/C of biochar produced at varied pyrolysis temperatures. At higher biochar production temperatures, the atomic ratios H/C and O/C were lower.

**Table S1: Elemental Composition of Vetiver Root Biochar**

| Sample ID         | Hg           | As    | Zn    | Cd    | Pb    | Ni    | Cr    | Cu    |
|-------------------|--------------|-------|-------|-------|-------|-------|-------|-------|
|                   | <b>µg/kg</b> |       |       |       |       |       |       |       |
| <b>B1-300-30</b>  | 0.232        | 0.053 | 14.62 | 0.155 | 0.183 | 5.678 | 1.855 | 10.62 |
| <b>B2-300-60</b>  | 0.206        | 0.040 | 11.98 | 0.147 | 0.177 | 4.446 | 1.826 | 7.592 |
| <b>B3-300-120</b> | 0.204        | 0.032 | 9.449 | 0.139 | 0.136 | 1.795 | 1.644 | 7.365 |
| <b>B4-500-30</b>  | 0.193        | 0.018 | 9.312 | 0.121 | 0.127 | 1.743 | 0.920 | 7.003 |
| <b>B5-500-60</b>  | 0.191        | 0.016 | 7.706 | 0.086 | 0.126 | 1.622 | 0.862 | 5.127 |
| <b>B6-500-120</b> | 0.190        | 0.015 | 6.947 | 0.075 | 0.106 | 0.876 | 0.725 | 4.667 |
| <b>B7-700-30</b>  | 0.186        | 0.010 | 4.664 | 0.072 | 0.100 | 0.824 | 0.722 | 4.622 |
| <b>B8-700-60</b>  | 0.186        | 0.009 | 4.336 | 0.068 | 0.097 | 0.341 | 0.673 | 4.522 |
| <b>B9-700-120</b> | 0.165        | 0.008 | 3.795 | 0.064 | 0.076 | 0.294 | 0.642 | 4.254 |

Biochars were prepared at three temperatures – 300, 500, and 700°C and three retention times – 30, 60, and 90 min. identified as B1 through B9.

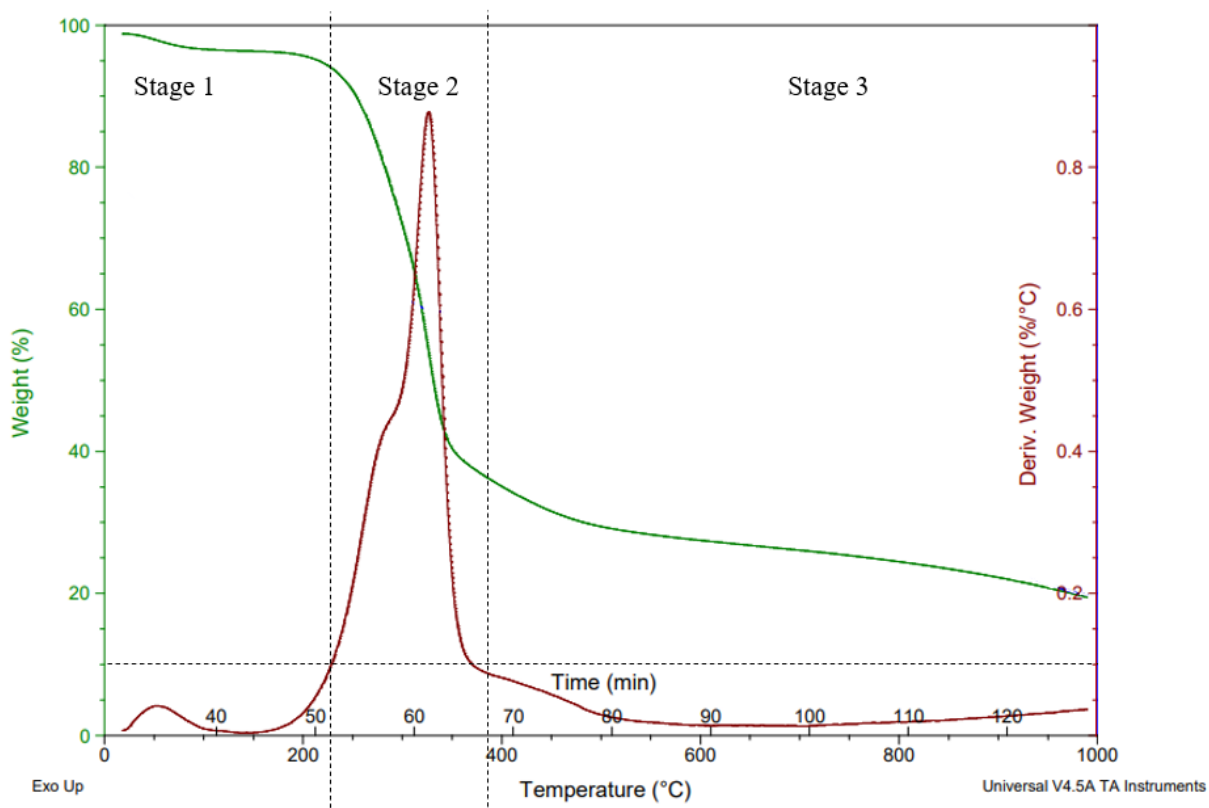

**Figure S2:** Thermogravimetric (TG) and derivative thermogravimetric (DTG) analysis for Vetiver Roots. Weight loss and derivative weight loss of the roots at heating rates of  $10^{\circ}\text{C min}^{-1}$  through a temperature range of 25 to  $1000^{\circ}\text{C}$ . The whole mass loss curves for the roots can be separated into three stages, as shown in the diagram.

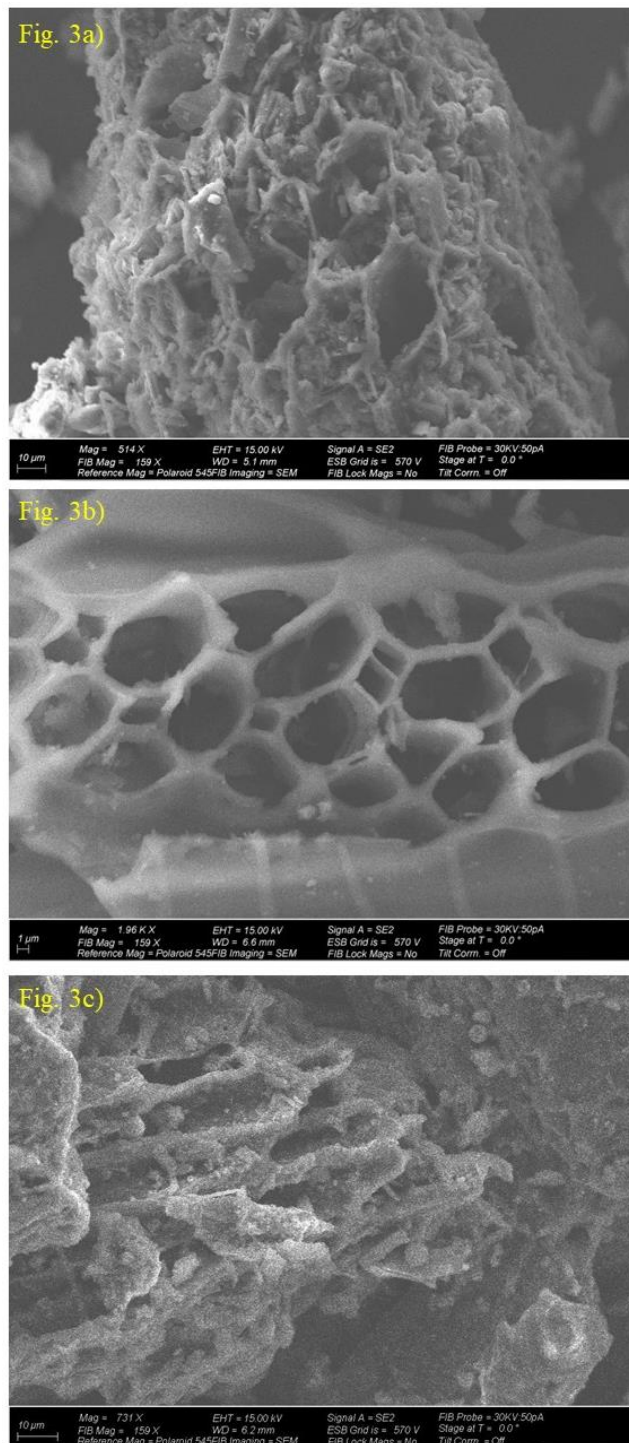

Figure S3. Spectroscopic analysis of vetiver biochar: Scanning Electron Microscope images for milled biochar particles: a) SEM for 300 °C - 60 min; b) SEM for 500 °C - 60 min; c) SEM for 700 °C - 60 min.
